# Supplementary material for: An amphiprotic paper-based electrode for glucose detection based on layered carbon nanotubes with silver and polystyrene particles
Source: Royal Society of Chemistry journal article supplement (doi:10.1039/d1ay01950c), 2022-01-01
Supplement: d1ay01950c1.pdf [file d1ay01950c1.pdf]

## Electronic Supplementary Information

### **Amphiprotic paper-based electrode for glucose detection based on layered carbon nanotubes with silver and polystyrene particles**

Yajun Zheng, Yu Li, Libin Fan, Hedan Yao, Zhiping Zhang\*

School of Chemistry and Chemical Engineering, Xi'an Shiyu University  
Xi'an 710065, China

\* To whom correspondence should be addressed.

E-mail: [zhipingzhang@xsyu.edu.cn](mailto:zhipingzhang@xsyu.edu.cn)

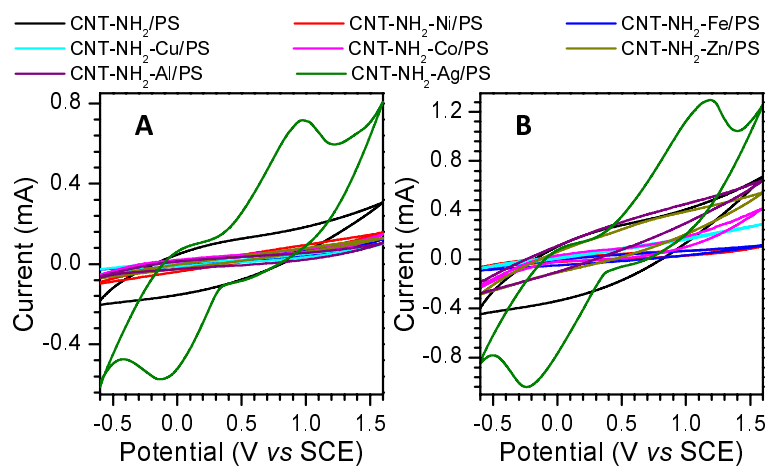

**Figure S1.** Comparison of the electrochemical performance of different paper electrodes containing various metal particles in the **(A)** absence and **(B)** presence of glucose (scanning speed:  $50 \text{ mV s}^{-1}$ ; concentration of glucose:  $100 \mu\text{M}$ ).

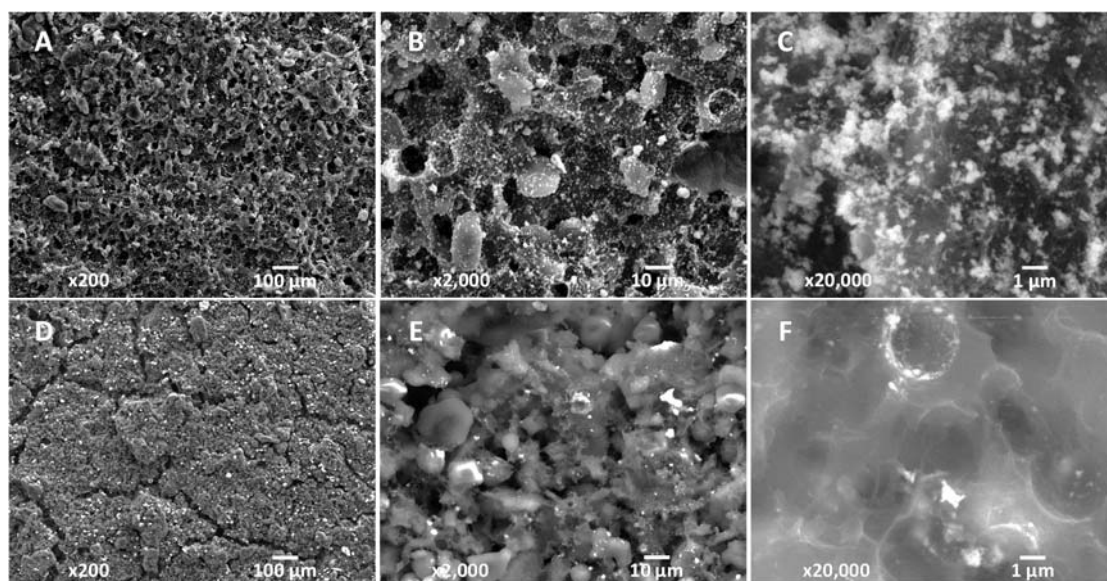

**Figure S2.** **(A)** SEM images of CNT-NH<sub>2</sub>/Ag-PS paper electrode and its **[(B) and (C)]** magnification images; **(D)** SEM images of CNT-NH<sub>2</sub>/Ag-PS paper electrode and its **[(E) and (F)]** magnification images.

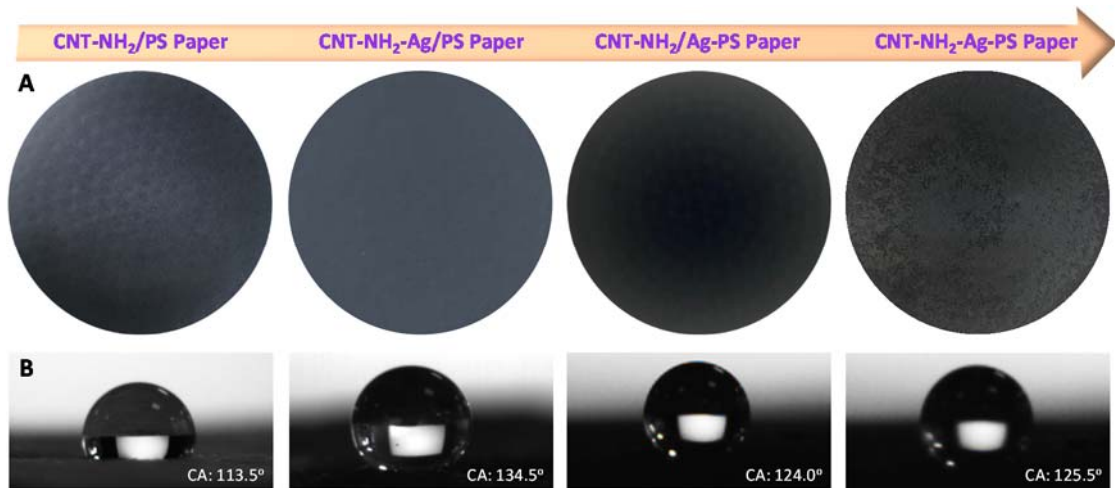

**Figure S3.** (A) Photographic images and (B) hydrophobicity of different paper electrodes.

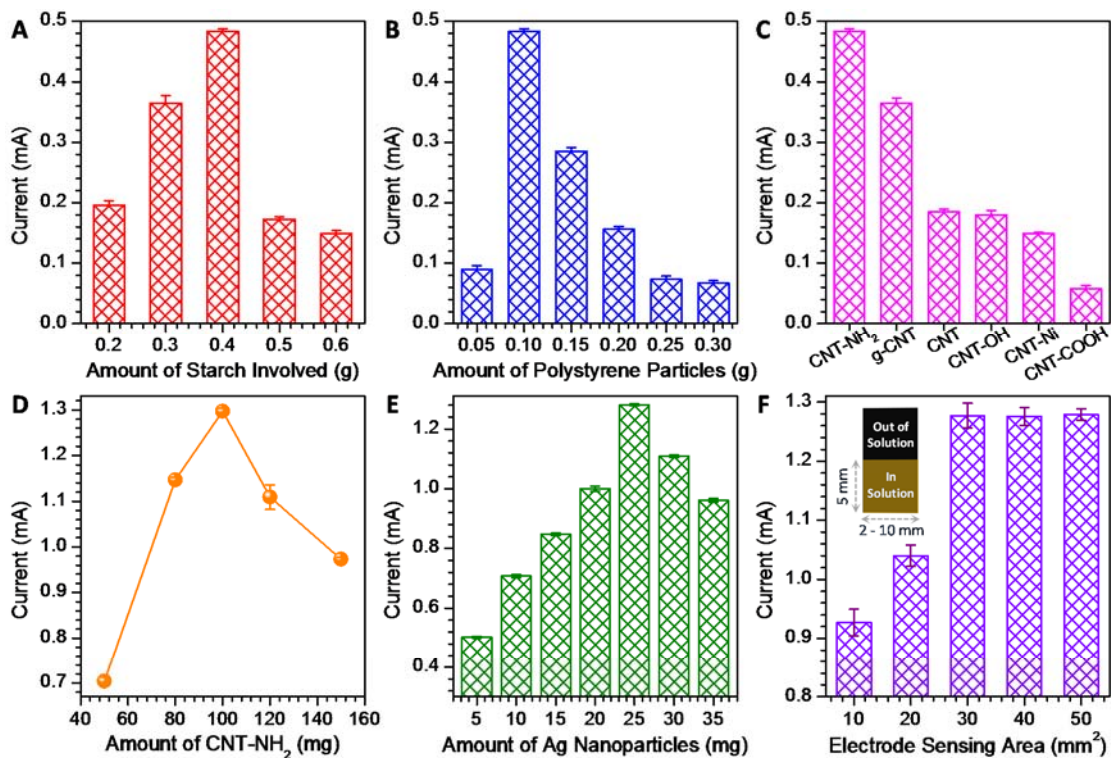

**Figure S4.** Effects of different experimental parameters on the electrochemical performance of CNT-NH<sub>2</sub>-Ag/PS paper electrode: (A) amount of starch involved, (B) amount of PS particles involved, (C) type of CNTs, (D) amount of CNT-NH<sub>2</sub> particles, (E) amount of Ag nanoparticles, and (F) electrode sensing area (inset is the schematic of paper electrode out of/in sample solution).

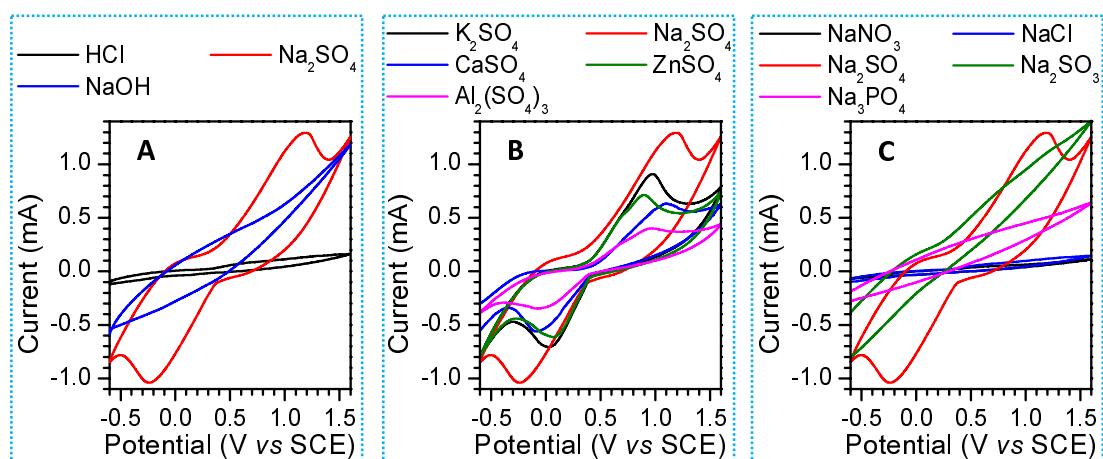

**Figure S5.** Comparison of the electrochemical performance of CNT-NH<sub>2</sub>-Ag/PS paper electrode in different systems: **(A)** acidic, neutral and basic solution; **(B)** metal salts containing various cations; **(C)** metal salts containing various anions (scanning speed: 50 mV s<sup>-1</sup>; concentration of glucose: 100 μM).

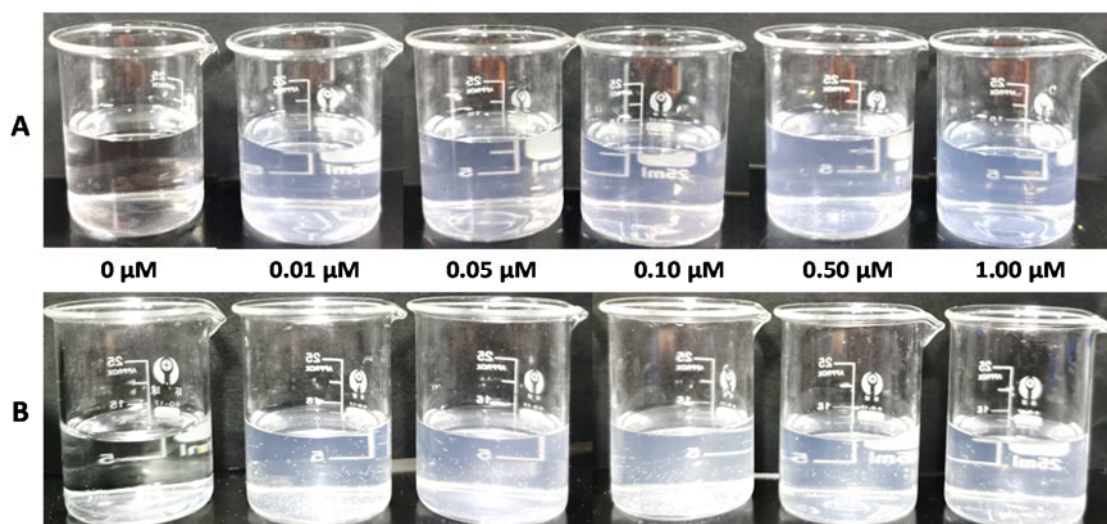

**Figure S6.** Photographic images of glucose solution by adding different concentrations of AgNO<sub>3</sub> solutions **(A)** without and **(B)** with electrochemical measurement (electrode: CNT-NH<sub>2</sub>-Ag/PS; scanning speed: 50 mV s<sup>-1</sup>; concentration of glucose: 100 μM).

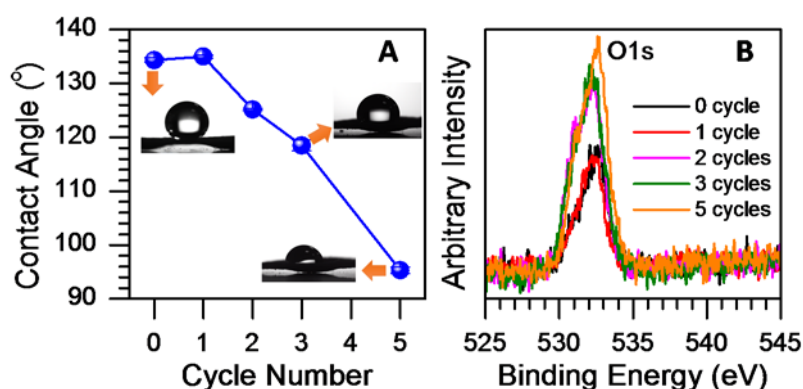

**Figure S7.** Variation of (A) the contact angles and (B) the peak intensity of O1s spectra with increase in the cycle number of fabricated paper electrode (the experiment conditions were same as that in Figure 4D, and insets are the corresponding images of hydrophobic properties).

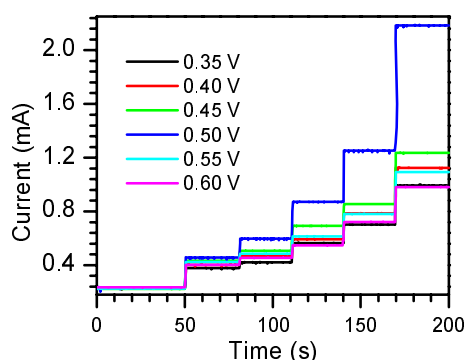

**Figure S8.** Amperometric response of CNT-NH<sub>2</sub>-Ag/PS paper electrode by the successive addition of glucose at the applied potential of 0.35, 0.40, 0.45, 0.50, 0.55 and 0.60 V.

**Figure S8** is a typical amperometric response of the same CNT-NH<sub>2</sub>-Ag/PS paper electrode at different working potentials ranging from 0.35 V to 0.60 V. By the successive addition of glucose at various potential, amperometry plots of CNT-NH<sub>2</sub>-Ag/PS paper electrode demonstrated a series of stair-step response. By varying the working potential, the current demonstrated a first increasing trend followed by a decreasing one. As the applied potential was 0.50 V, the current reached the highest increment. Due to this reason, 0.50 V was chosen as the optimal potential.

**Table S1.** Fitting equivalent circuit parameters of different fabricated electrodes immersed in 0.1 M Na<sub>2</sub>SO<sub>4</sub> solution, 5.0 mM K<sub>3</sub>[Fe(CN)<sub>6</sub>], and 5.0 mM K<sub>4</sub>[Fe(CN)<sub>6</sub>].

| electrodes                 | $R_s$ ( $\Omega$ ) | $R_{ct1}$ ( $\Omega$ ) | $R_{ct2}$ ( $\Omega$ ) | $CPE1$ ( $\mu F$ ) | $CPE2$ ( $\mu F$ ) |
|----------------------------|--------------------|------------------------|------------------------|--------------------|--------------------|
| CNT-NH <sub>2</sub> +Ag/PS | 53.41              | 573.1                  | 1873.0                 | 0.969              | 0.265              |
| CNT-NH <sub>2</sub> +Ag+PS | 57.65              | 667.3                  | 2726.0                 | 0.958              | 0.369              |
| CNT-NH <sub>2</sub> +Ag/PS | 58.19              | 844.3                  | 2807.0                 | 1.008              | 0.408              |
| CNT-NH <sub>2</sub> /PS    | 59.66              | 1180.0                 | 1666.0                 | 1.032              | 0.233              |
